# Supplementary material
Source: MDPI journal article supplement (https://www.mdpi.com/2071-1050/16/1/185)
Supplement: s1 [file s1]

## Supplementary material

### The Risk of Water Quality Deterioration Accompanied by Urban Flood Control-A Case in Wuxi

#### 2.2 Sample Collection and Laboratory Analysis

**Table S1 Surface Water Environment Quality Standard  
(GB 3838-2002)  
(unit:mg/L)**

| Class | TN  | TP   | COD <sub>Mn</sub> | NH <sub>3</sub> -N |
|-------|-----|------|-------------------|--------------------|
| I     | 0.2 | 0.02 | 2                 | 0.15               |
| II    | 0.5 | 0.1  | 4                 | 0.5                |
| III   | 1.0 | 0.2  | 6                 | 1.0                |
| IV    | 1.5 | 0.3  | 10                | 1.5                |
| V     | 2.0 | 0.4  | 15                | 2.0                |

### 3.2 Pollution level and degree

**Table S2 CCME WQI Water Quality Classification**

| Score threshold | Grade     | Features                                                                                             |
|-----------------|-----------|------------------------------------------------------------------------------------------------------|
| 95-100          | Excellent | Very close to the natural water body, and the water environment is not damaged                       |
| 80-94           | Good      | It rarely deviates from the natural water body, and the water environment is only slightly damaged   |
| 65-79           | Fair      | Occasionally offset the natural water body, and the water environment is damaged to a certain extent |
| 45-64           | Marginal  | It often deviates from the natural water body, causing great damage to the water environment         |
| 0-44            | Poor      | It usually deviates from the natural water body, and the water environment is greatly damaged        |

### 3.3 Development of pollutants

**Table S3 Mann-kendall trend types and features**

| $\beta$ (Slope Estimate) | Z (Statistic)        | Tend type | Trend features                 |
|--------------------------|----------------------|-----------|--------------------------------|
| $\beta > 0$              | $2.58 < Z$           | 4         | Extremely significant increase |
|                          | $1.96 < Z \leq 2.58$ | 3         | Significant increase           |
|                          | $1.65 < Z \leq 1.96$ | 2         | Slightly significant increase  |
|                          | $Z \leq 1.65$        | 1         | Not significantly increased    |
| $\beta = 0$              | Z                    | 0         | No change                      |
| $\beta < 0$              | $Z \leq 1.65$        | -1        | Not significantly decreased    |
|                          | $1.65 < Z \leq 1.96$ | -2        | Slightly significant decrease  |
|                          | $1.96 < Z \leq 2.58$ | -3        | Significant decrease           |
|                          | $2.58 < Z$           | -4        | Extremely significant decrease |

## Formula

### 2.3.3 Water Quality Index

$$\begin{aligned}
 F_1 &= \left( \frac{1}{M} \sum_{i=1}^M \max_{j=1,2,\dots,N} \{s_{ij}\} \right) \times 100 \\
 F_2 &= \left( \frac{1}{MN} \sum_{i=1}^M \sum_{j=1}^N s_{ij} \right) \times 100 \\
 F_3 &= \frac{\sum_{i=1}^M \sum_{j=1}^N e_{ij}}{\sum_{i=1}^M \sum_{j=1}^N e_{ij} + MN} \times 100
 \end{aligned} \tag{S1}$$

In the formula,  $F_1$  is the percentage of index exceeding the standard;  $F_2$  is the percentage of data exceeding the standard;  $F_3$  is the percentage of amplitude exceeding the standard;  $M$  is the index number,  $N$  is the number of measuring points,  $s_{ij}$  is the scale value,  $e_{ij}$  is the percentage exceeding the standard.

The allowable limit of a single index in this region is  $c_i$ , the measured value of  $I$  at section  $j$  is  $x_{ij}$ .

The higher the indicator, the better:  $x_{ij} \geq c_i$  is up to standard otherwise it is over standard,  $e_{ij} = (c_i - x_{ij}) / x_{ij}$ .

The lower the indicator, the better:  $x_{ij} \leq c_i$  is up to standard otherwise it is over standard,  $e_{ij} = (x_{ij} - c_i) / c_i$ .

When reaching the standard:  $S_{ij} = 0$ . When exceeding the standard:  $S_{ij} = 1$ .

Then CCME WQI model constructs the three factors  $F_1$ ,  $F_2$  and  $F_3$  as water quality index, and obtains the score:

$$WQI = 100 - \sqrt[3]{F_1^2 + F_2^2 + F_3^2} / 1.732 \tag{S2}$$

#### 2.3.4 Mann-Kendall Trend

$$\beta = \text{Median} \left( \frac{x_j - x_i}{j - i} \right) \forall j > i \quad (\text{S3})$$

$$\text{sgn}(x_j - x_i) = \begin{cases} +1 & x_j - x_i > 0 \\ 0 & x_j - x_i = 0 \\ -1 & x_j - x_i < 0 \end{cases}$$

$$\text{Var}(S) = \frac{n(n-1)(2n+5)}{18}$$

$$S = \sum_{i=1}^{n-1} \sum_{j=i+1}^n \text{sgn}(x_j - x_i)$$

$$Z = \begin{cases} \frac{S}{\sqrt{\text{Var}(S)}} & (S > 0) \\ 0 & (S = 0) \\ \frac{S+1}{\sqrt{\text{Var}(S)}} & (S < 0) \end{cases} \quad (\text{S4})$$

In the formula:  $\beta$  is the slope estimate;  
 $x_i$  and  $x_j$  are the are dual values.  
 $\text{Var}(s)$  is the variance;  
 $n$  is the number of data in the sequence;  
 $S$  is the statistics that follow a normal distribution;  
 $Z$  is the statistic.
